# Supplementary material for: Filovirus RNA in Fruit Bats, China
Source: Emerg Infect Dis. 2015 Sep;21(9):1675–7. doi: 10.3201/eid2109.150260 (PMC4550138; doi:10.3201/eid2109.150260)
Supplement: Technical Appendix — Sample collection, preparation, and outcomes of testing for filoviral RNA in fruit bats, China. [file 15-0260-Techapp-s1.pdf]

# Filovirus RNA in Fruit Bats, China

## Technical Appendix

### Sample collection, preparation, and outcomes of testing for filoviral RNA in fruit bats, China

In June 2013, 29 apparently healthy *Rousettus leschenaulti* bats were captured by using a bird net in a longan orchard in Yunnan province of China. Living bats were euthanized by intravenous injection of potassium chloride at the local Center for Animal Diseases Control and Prevention. We intended to focus on encephalitis-related viruses in brains, respiratory tract-borne viruses in lungs, and viruses in digestive system, therefore the brains, lungs, livers and intestines of each bat were collected separately into cryotubes and immediately frozen in a liquid nitrogen tank prior to transportation to the laboratory, where they were stored at  $-80^{\circ}\text{C}$ .

Bat samples were prepared for metagenomic analysis as described by He et al. (1). The intestines, lungs, livers, and brains of 29 bats were pooled together and homogenized in SM buffer (1:10 [w/v]; 50 mM Tris, 10 mM  $\text{MgSO}_4$ , 0.1 M NaCl, pH7.5). The homogenized samples were centrifuged at  $8,000\times g$  at  $4^{\circ}\text{C}$  for 30 min to remove cell debris and foreign materials, and the supernatants were immediately filtered through 0.45- $\mu\text{m}$  and 0.22- $\mu\text{m}$  filters (Millipore). Host genomes and other free nucleic acids were eliminated by digestion of nuclease mixture containing DNase (Ambion), Benzonase Nuclease (Novagen) and RNase I (Fermentas).

The viral RNAs were then extracted immediately using QIAamp® Viral RNA Mini Kit (Qiagen) according to the manufacturer's protocol. Total viral RNAs were dissolved in RNase-free  $\text{H}_2\text{O}$  and used immediately for the following reverse transcription with SuperScript III reverse transcriptase (Invitrogen) using anchored random primers according to the manufacturer's protocol. To synthesize dsDNA, a Klenow fragment (New England Biolabs)

was added to the cDNA mixture, and incubated at 37°C for 60 min. After inactivation of the enzyme, phosphates and free single-stranded bases in the dscDNA reaction was removed using shrimp alkaline phosphatase and exonuclease I (TaKaRa).

To obtain sufficient viral nucleic acid, single primer amplification was employed to amplify the dscDNA with the Accuprime Taq DNA Polymerase System (Invitrogen) according to the manufacturer's protocol. Briefly, a 50 µl reaction system containing 10 µl of the above dscDNA mixture, random primers (20 mM), 10×Accuprime buffer I, and Taq DNA Polymerase (1 U) was denatured at 94°C for 2 min, followed by 40 cycles of 94°C denaturing for 30 s, 54°C annealing for 30 s, 68°C extending for 1 min with final 68°C extension for 8 min. The PCR products were then purified using the QIAquick PCR Purification Kit (Qiagen) and dissolved in 50 µl TE buffer (100 mM Tris-HCl, 10 mM EDTA, pH8.0). The purified PCR products were pooled together and then subjected to HiSeq 2000 (Solexa) sequencing in 1 lane by the Beijing Genome Institute (BGI).

To screening filovirus in these samples, the longest contig generated by viral metagenomic analysis was used as a template for design of specific semi-nested primers (Filo-F/Filo-in-F/Filo-R). Nested degenerate primer pairs (FV-F1/FV-R1, FV-F2/FV-R2) were also designed targeting the most conserved region of the L gene of all currently known filoviruses. Viral RNA of each tissue was extracted as above description; cDNA was synthesized by random hexamers and SuperScript III reverse transcriptase (Invitrogen). The 2 PCR methods were conducted by the same Master PCR Mix (Tiangen) and program: denaturing at 94°C for 2 min, followed by 30–35 cycles of 94°C denaturing for 30 s, 54°C annealing for 30 s, 72°C extending for 40 s with final 72°C extension for 5 min. PCR products with expected size were directly sequenced by an ABI 3730 DNA Analyzer (Invitrogen).

The positive sample obtained by above RT-PCR screening was used for full genome amplification. A total of 2 dozen degenerate primer pairs covering the full genome were further

designed by alignment of these contigs with the full genomes of representative filoviruses within the 3 genera. The positive cDNA and LA Taq DNA polymerase (TaKaRa) were used to amplify full genome according to the manufacturer's protocol. The reaction system was denatured at 94°C for 2 min, followed by 40 cycles of 94°C denaturing for 30 s, 54-57°C annealing for 30 s, 72°C extending for 1–3 min with final 72 °C extension for 7 min. Negative control was ddH<sub>2</sub>O, but positive control was not considered due to filoviruses not available in China as well as a lack of corresponding biosafety facility. Positive amplicons were purified and ligated into the pMD18-T vector (TaKaRa), used to transfect TOP10 chemically competent *Escherichia coli* (Tiangen), and then sequenced by an ABI 3730 DNA Analyzer (Invitrogen). Of each amplicon, 5 clones were sequenced.

Technical Appendix Table 1. Sequences of contigs generated by viral metagenomic analysis and their identities to filoviruses\*

| Contig | bp  | Sequence (5'→3')                                                                                                                                                                                                                                                                                                                                                                              | Gene | Nucleotide identity | Virus (Genbank Accession no./location)            |
|--------|-----|-----------------------------------------------------------------------------------------------------------------------------------------------------------------------------------------------------------------------------------------------------------------------------------------------------------------------------------------------------------------------------------------------|------|---------------------|---------------------------------------------------|
| 1      | 207 | AATAATCTGGAACATGGATTGTATCCTCAGTTATCAGCTAT<br>AGCAATAGGTATTGCAACTGCACATGGCAGCACACTTGGAA<br>GGTGTTAATGTAGGTGAACAATTTCAACCATTGCGTGAAG<br>CTGCAACAGAGGCAGAAAAGCAGCTACAACGGTACACAG<br>AAATAAGGAATTGGACCAGCAAGGTTTAGATGATCAAGA<br>ACGTAAG                                                                                                                                                           | NP   | 74%                 | Lloviu virus<br>(JF828359/1,395-1,601)            |
| 2      | 354 | GTGAAATGCTGTCCCGAACAATTGAAAGATGCTCATGAGA<br>ATTTGACTCGTGTTAATTCATTAAGTAAAAAAGTTTGGCTA<br>AACCTAGTTTTACAGCTAAAGAACTTAGAGATATGATATAT<br>GATCATCTTCCAGGATATGAGACAGCATTTCACCAATTAAC<br>ACAGGTAATATGCAAGATTGCAAAAGATGAGGGTCAATTG<br>GAGCAAGTTCATACAGAATTTCAATCCTTAGCTGAAG<br>GTGATTCTCCACAAAGTGCATTAATACAATTGACTAAACGC<br>ATGACTATTTTCGACGGAAGATCACCTCCACTGATTATAT<br>AAACACACGAGCAGCCTACGACGACGAT | VP35 | 69%                 | Sudan ebolavirus<br>(KC24278/3,668-4,022)         |
| 3      | 129 | TTCTCTGGATTCAAAAAGGACACAGACATTGGGCTATTAG<br>CACTCAAAAAGCCATTAGATTATAGTACAATTGTTGTCACC<br>TTATCAATACCCCAAGTCTTAGGGGGATTATCATTTTTGAA<br>TCCAGAG                                                                                                                                                                                                                                                 | L    | 72%                 | Tai Forest ebolavirus<br>(FJ217162/14,191-14,319) |

| Contig | bp | Sequence (5'→3') | Gene | Nucleotide identity | Virus (Genbank Accession no./location) |
|--------|----|------------------|------|---------------------|----------------------------------------|
|--------|----|------------------|------|---------------------|----------------------------------------|

\*NP, nucleoprotein; VP, viral protein.

Technical Appendix Table 2. Primers used in this study. Primers Filo-F, Filo-in-F, Filo-R, FV-F1, FV-R1, FV-F2 and FV-R2 are used to screen filovirus in samples, the rest are used to amplify full genome. The locations of primers refer to the position on the genome of EBOV (HQ613402).

| Primer    | Sequence (5'→3')             | Polarity | Location      |
|-----------|------------------------------|----------|---------------|
| Filo-F    | TGATATATGATCATCTCCAGG        | +        | 3,727-3,748   |
| Filo-in-F | GCATTTACCAATTAACACAGG        | +        | 3,759-3,780   |
| Filo-R    | TTTATATGAATCAGTGGAGGTG       | –        | 3,920-3,941   |
| FV-F1     | GCMTTYCCAGYAAYATGATGG        | +        | 13,261-13,282 |
| FV-R1     | GTDATRCAYTGRTRTCHCCCAT       | –        | 13,713-13,739 |
| FV-F2     | TDCAYCARGCITCDTGGCAYC        | +        | 13,316-13,336 |
| FV-R2     | GIGCACADGADATRCWIGTCC        | –        | 13,646-13,666 |
| F1        | ATCTGGAACATGGMGTGTATCC       | +        | 1,308-1,329   |
| F2        | GGAACATGGMGTGTATCCTCAG       | +        | 1,312-1,333   |
| R1        | GYTTYTCWGCCTCTGTTGCAGC       | –        | 1,424-1,445   |
| F3        | ACTGCTGCAGCTACTGAAGCTTACTGG  | +        | 3,510-3,536   |
| F4        | AAAGATGCTCATGAGAATTTGACTCG   | +        | 3,780-3,805   |
| F5        | TCCTTAGCTGAAGGTGATTCTCC      | +        | 3,843-3,865   |
| F6        | CCAGGATATGGGACAGCATTTACC     | +        | 3,889-3,913   |
| F7        | AAGATTGCAAAAGATGAGGGTCAATTGG | +        | 3,933-3,960   |
| F8        | CCTCCTTAGCTGAAGGTGATTCTCC    | +        | 3,986-4,010   |
| F9        | CARAAVWYVTAYAGYTTTGAYTCAAC   | +        | 4,704-4,729   |
| R2        | GCDGMNGYNGTTGARTCAAARC       | –        | 4,717-4,738   |
| R3        | GGNACACCDGHHCKRAADSCCCA      | –        | 6,213-6,235   |
| F10       | YCCHMGNTGYCGBTATGTICAC       | +        | 6,353-6,374   |
| R4        | TGTGNACATAVCGRCANCKDGG       | –        | 6,354-6,375   |
| F11       | CRGACACACAAAAASAADRRA        | +        | 7,237-7,257   |
| F12       | TGGACDGGNTGGMRRRCARTGG       | +        | 7,889-7,909   |
| R5        | AYCCAYTGYYKCCANCCHGTCC       | –        | 7,890-7,911   |
| F13       | VVDTTYGARGCHGCVYTRTGCG       | +        | 9,088-9,109   |
| F14       | GCHGCVYTRTGCGCARSRDTGGG      | +        | 9,097-9,118   |
| F15       | WGCYVYTRTGCGCARCADTGGG       | +        | 9,099-9,118   |
| R6        | GAYYSYCKRTCCCAHTGYTGCC       | –        | 9,107-9,128   |
| R7        | GTCAKBGHCCAKGCWGGDGC         | –        | 10,459-10,478 |
| F16       | GARTAACTAYGARGAAKATTAA       | +        | 11,410-11,431 |

| Primer | Sequence (5'→3')             | Polarity | Location      |
|--------|------------------------------|----------|---------------|
| F17    | CCHATHGTYNYTVGAYCARTGTG      | +        | 11,545-11,566 |
| F18    | CCHATWRTBYTVGAYCARTGTGA      | +        | 11,545-11,567 |
| F19    | TNCARAARCAYTGGGBCAYCC        | +        | 12,611-12,632 |
| R8     | TAGTTCATTGTGGAGTACAGGATGCC   | –        | 12,627-12,652 |
| R9     | GTAATTTCAACTTTGTGGCATG       | –        | 12,673-12,694 |
| R10    | CACTGGTACTAGTTCTATTGTGATGCC  | –        | 13,331-13,357 |
| R11    | CTAGTGAACATCATCTAAAGGC       | –        | 13,414-13,436 |
| R12    | AATGGTCTAGTGAACATCATCTAAAGGC | –        | 13,414-13,442 |
| R13    | GGTCTAGTGAACATCATCTAAAGGC    | –        | 13,415-13,440 |
| R14    | TTTGGCTTGTTAGACAGTGAGGTGG    | –        | 13,543-13,567 |
| R15    | AATTTGAGCACATGATATGCTAGTCC   | –        | 13,647-13,672 |
| F20    | GATTAACATGGGCAACGCAAGG       | +        | 15,173-15,194 |
| F21    | GTGTTAATTTGGAGGTTGAGG        | +        | 15,240-15,260 |
| F22    | TGTTACCAGTACATTATTCAGG       | +        | 15,272-15,293 |
| R16    | GWRTTRCTCATNCKRTTBGCCAT      | –        | 15,340-15,362 |
| F23    | GCNAGYAAYYTTYTYCAYGCDTC      | +        | 16,393-16,415 |
| R17    | TCRTMHARYTTRTAATGCATKGA      | –        | 16,933-16,955 |
| R18    | CYTCRTCNAVYTTTARTGCATKG      | –        | 16,934-16,957 |
| R19    | GCHARKGAHGCRGTGRAARAARTTRC   | –        | 16,937-16,957 |
| R20    | TYTYDGTNGTYTCWGCATCCAT       | –        | 17,275-17,297 |
| R21    | WRTTYCWRTHGTYTCWGCATCC       | –        | 17,277-17,299 |

## Reference

1. He B, Li Z, Yang F, Zheng J, Feng Y, Guo H, et al. Virome profiling of bats from Myanmar by metagenomic analysis of tissue samples reveals more novel mammalian viruses. PLoS ONE. 2013;8:e61950. <http://dx.doi.org/10.1371/journal.pone.0061950>
